# Supplementary material for: Comparative genomics and transcriptomics in ants provide new insights into the evolution and function of odorant binding and chemosensory proteins
Source: PubMed Central journal article supplement (PMC4161878; doi:10.1186/1471-2164-15-718), 2014-08-26
Supplement: 12864_2014_6421_MOESM2_ESM.pdf [file 12864_2014_6421_MOESM2_ESM.pdf]

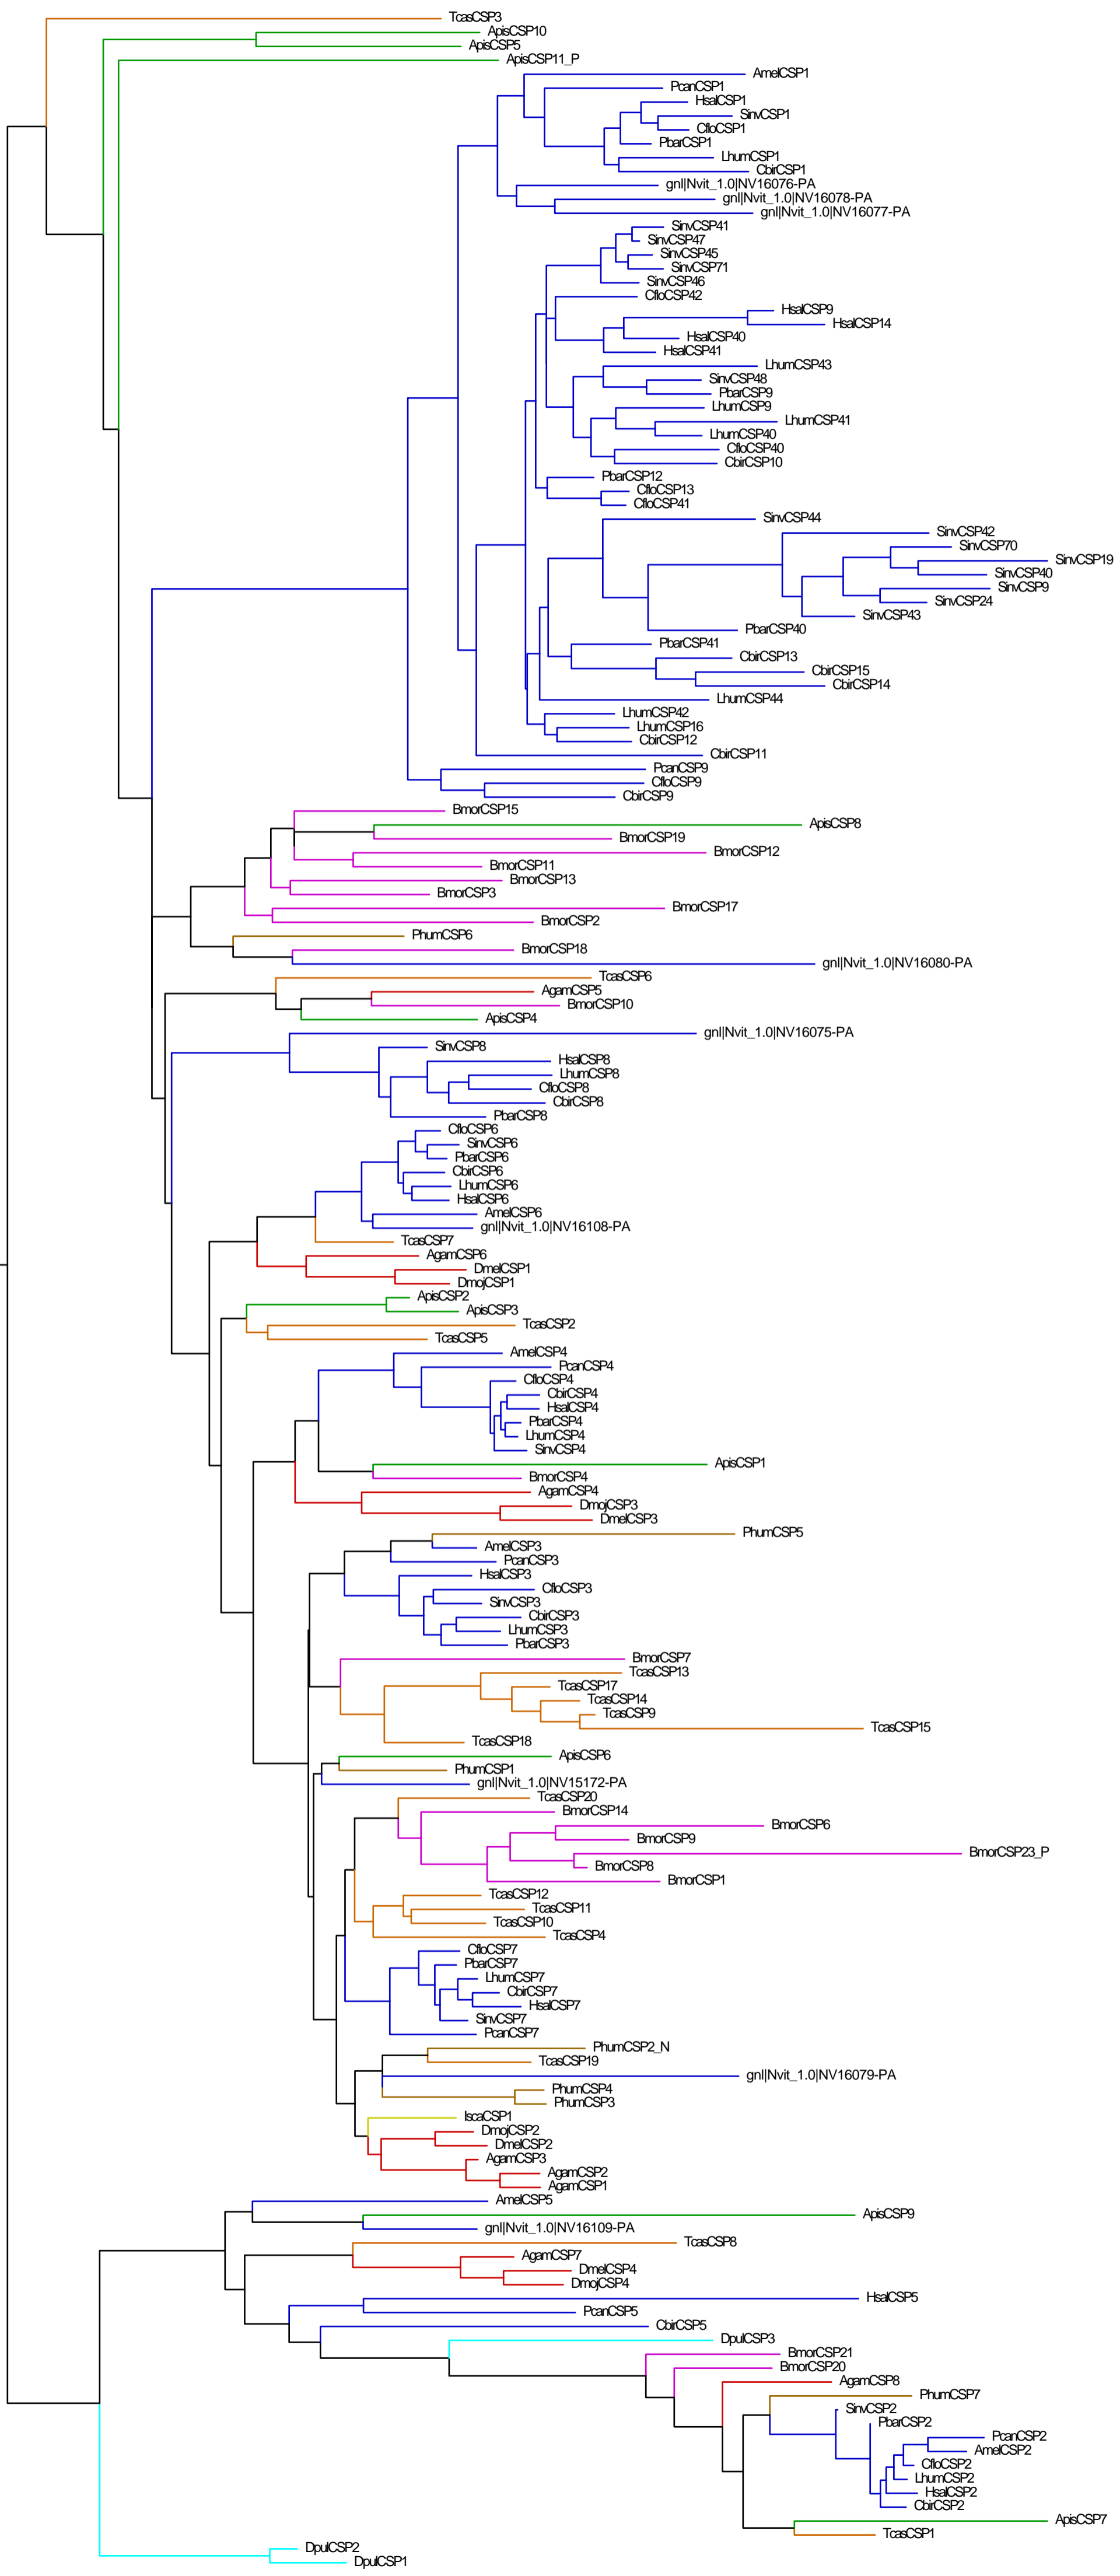

0.5
