# Supplementary material for: Comparative genomics and transcriptomics in ants provide new insights into the evolution and function of odorant binding and chemosensory proteins
Source: PubMed Central journal article supplement (PMC4161878; doi:10.1186/1471-2164-15-718), 2014-08-26
Supplement: 12864_2014_6421_MOESM6_ESM.pdf [file 12864_2014_6421_MOESM6_ESM.pdf]

RAxML tree  
including signal  
peptides

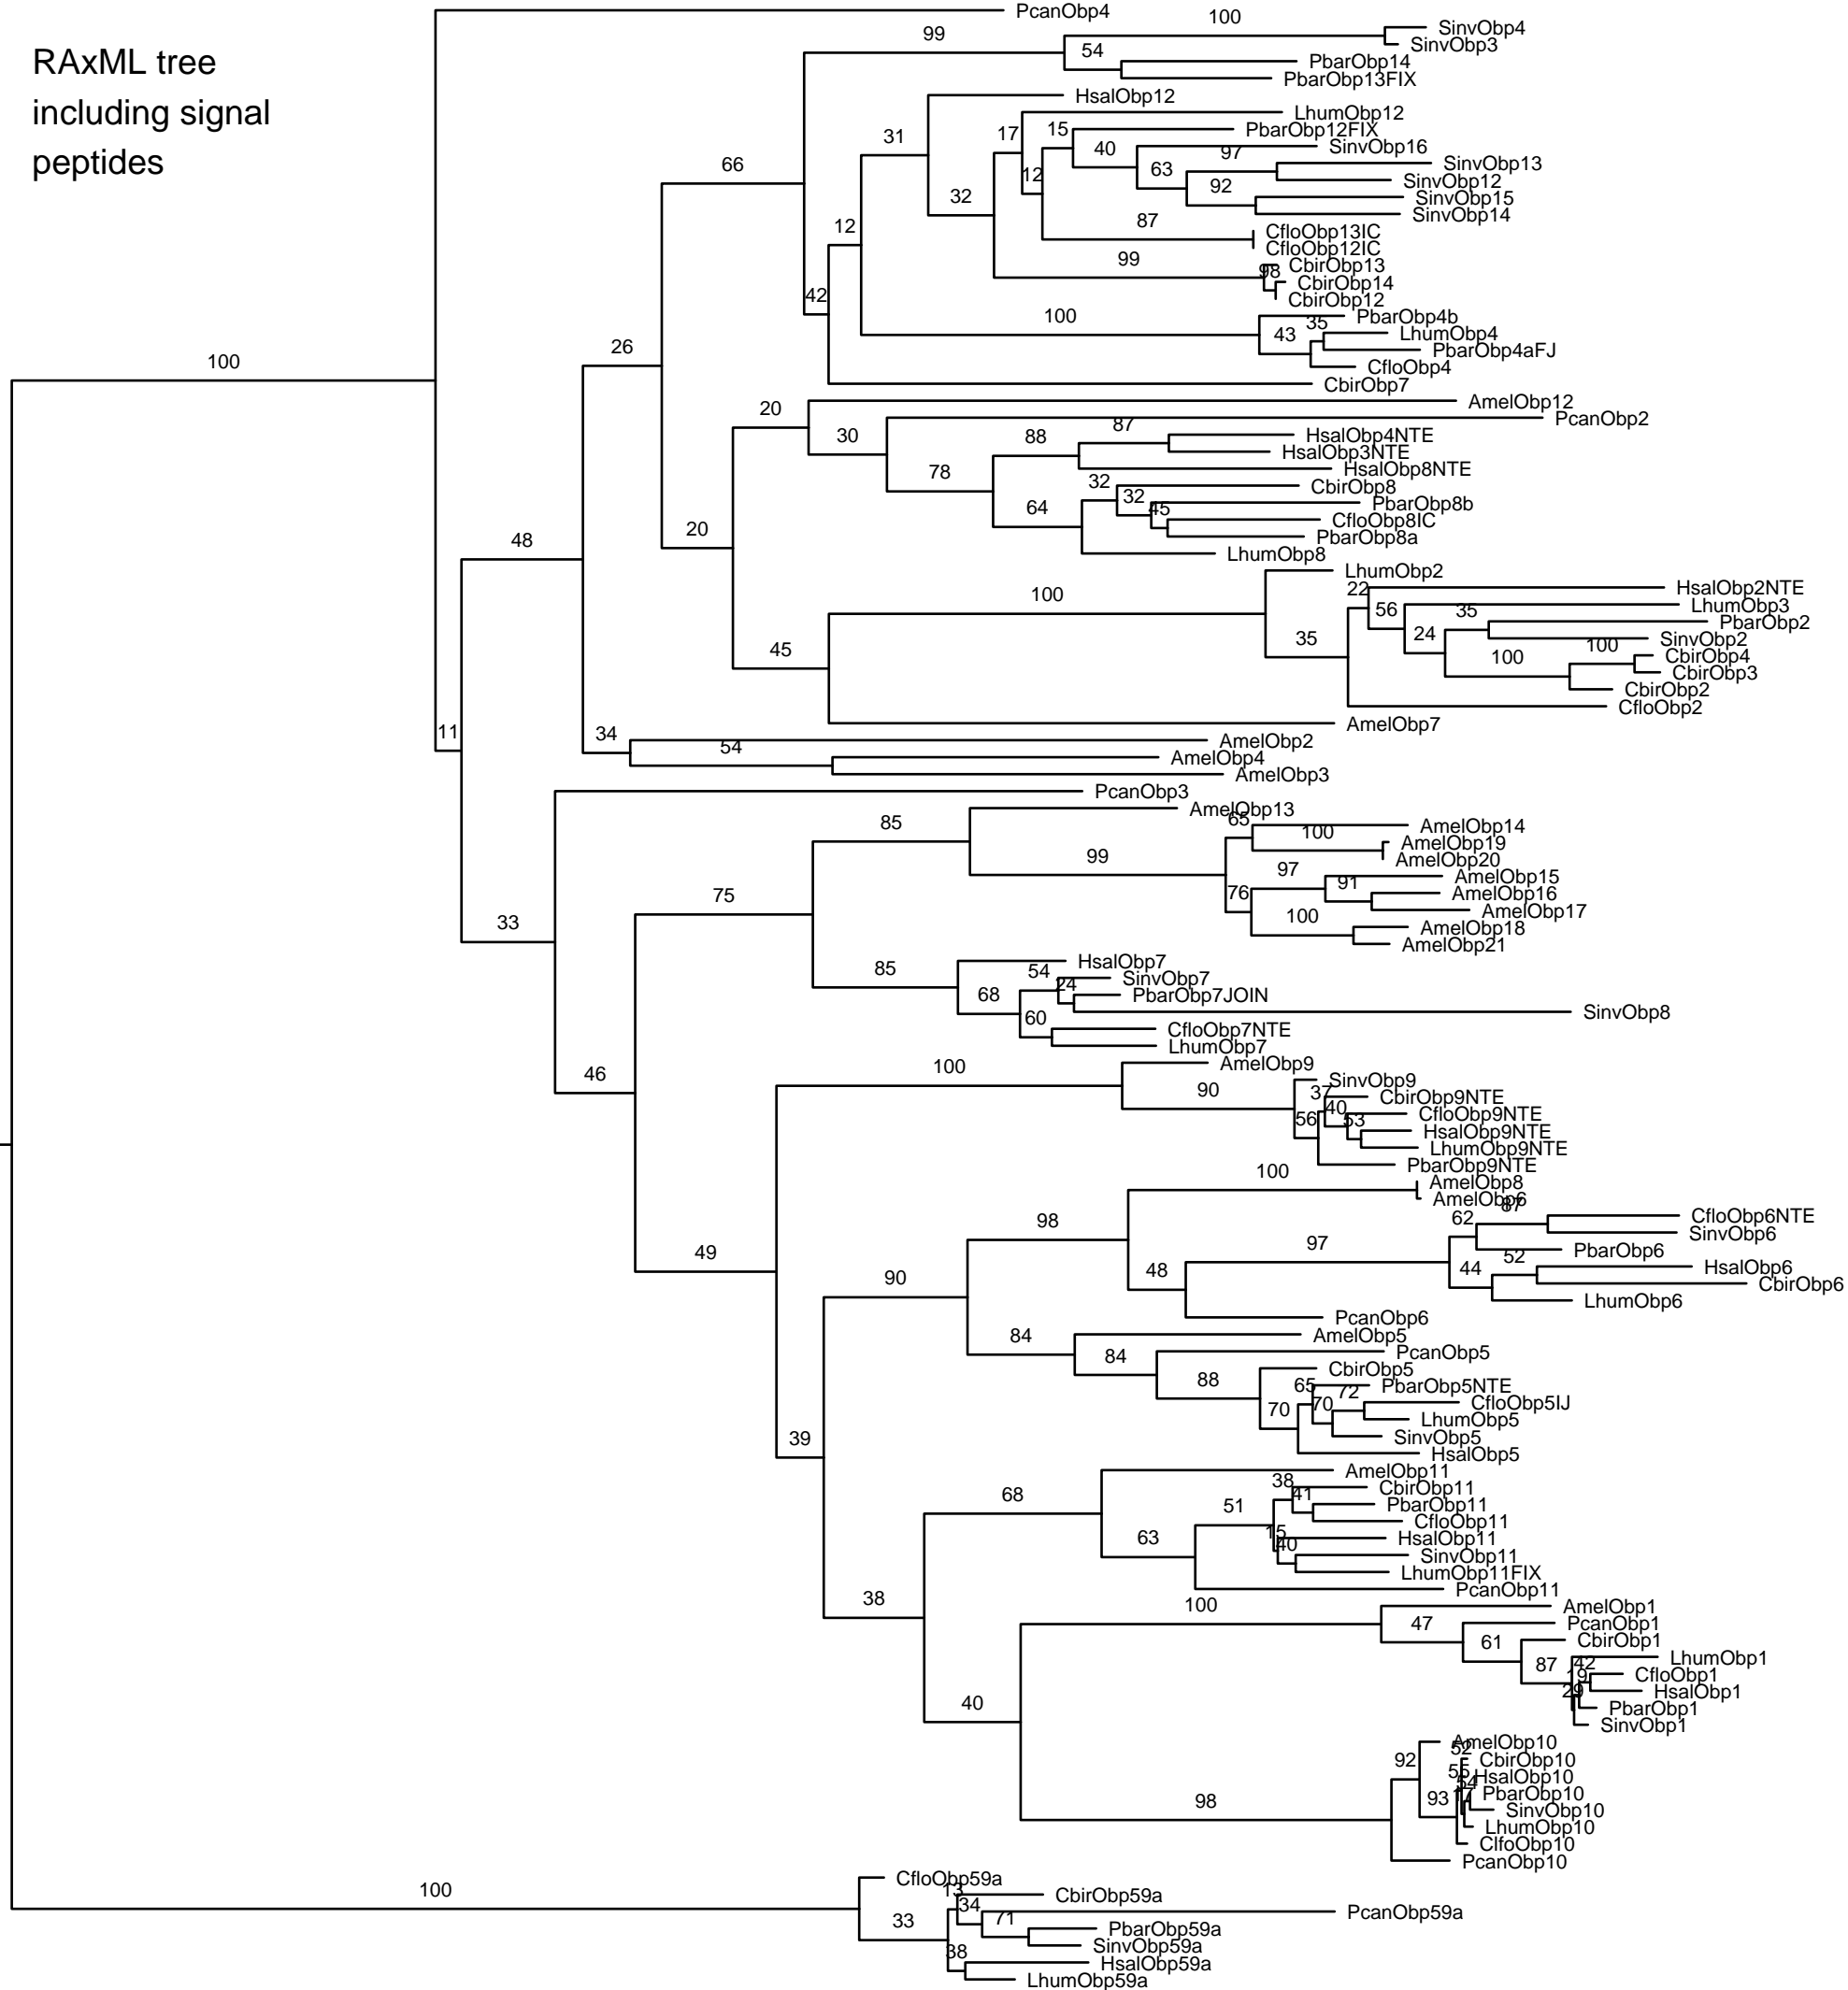

0.7

RAXML tree excluding signal peptides

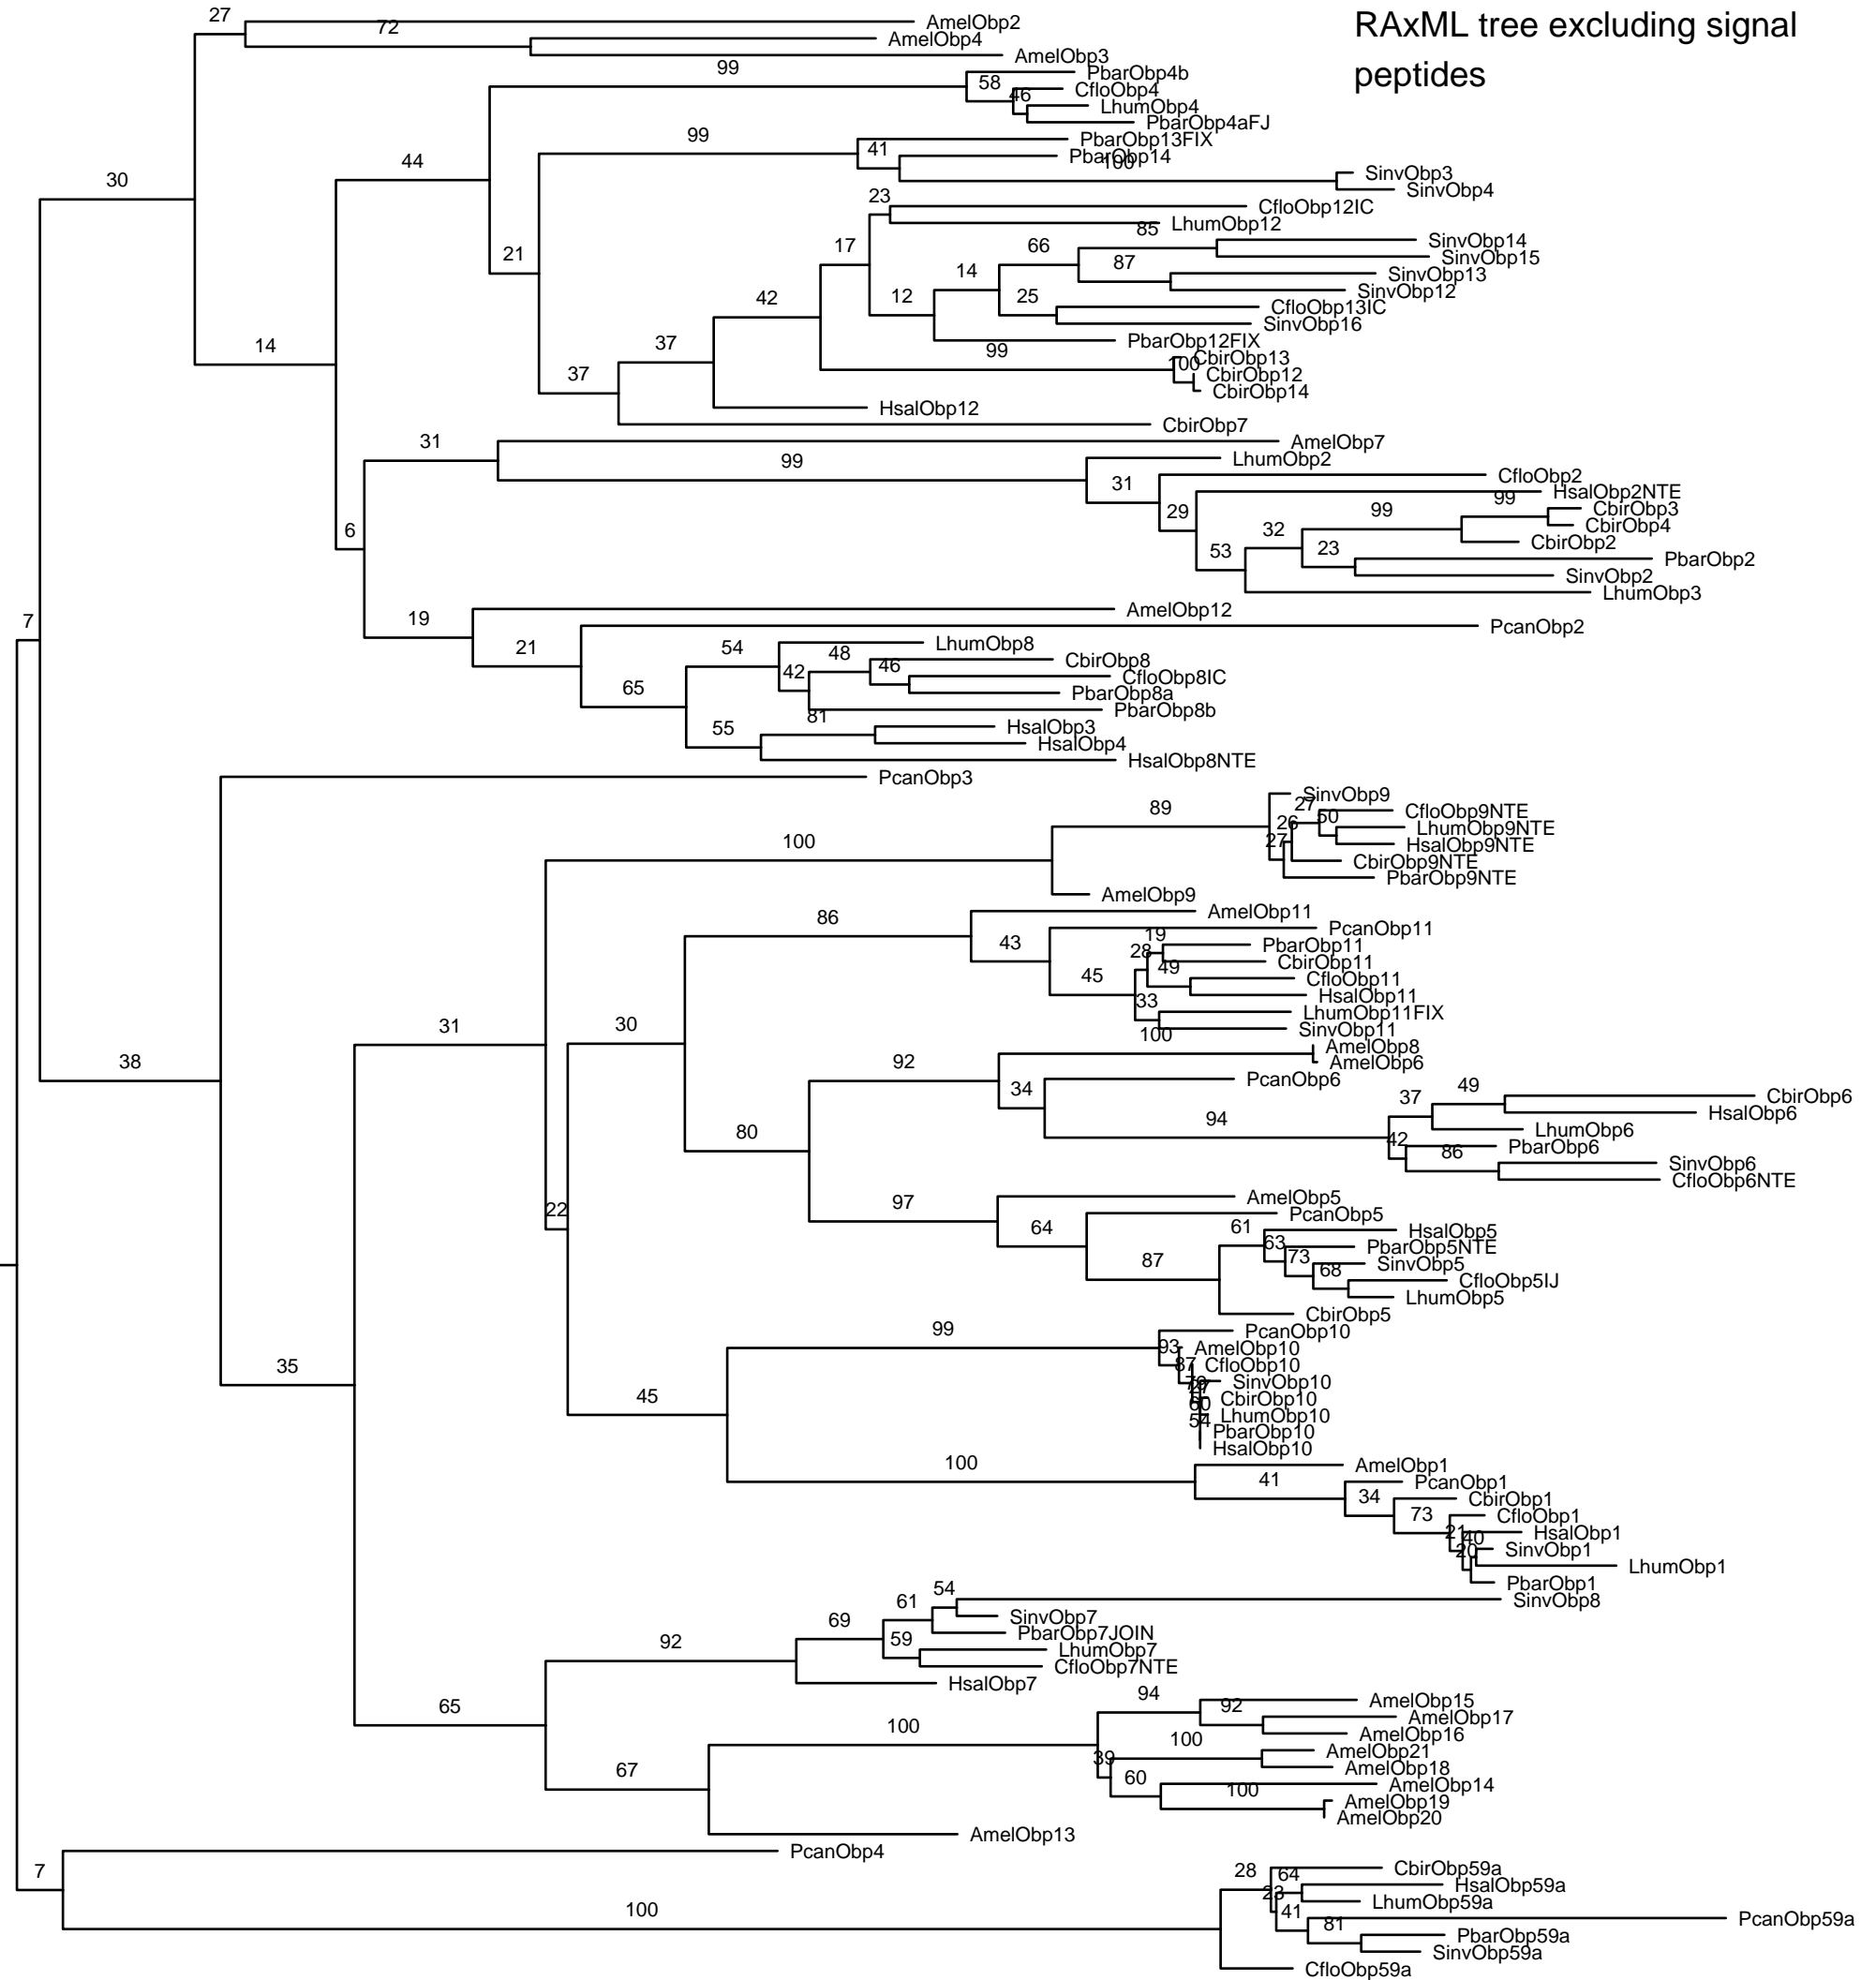

0.6

Bali-Phy consensus tree with posterior probabilities

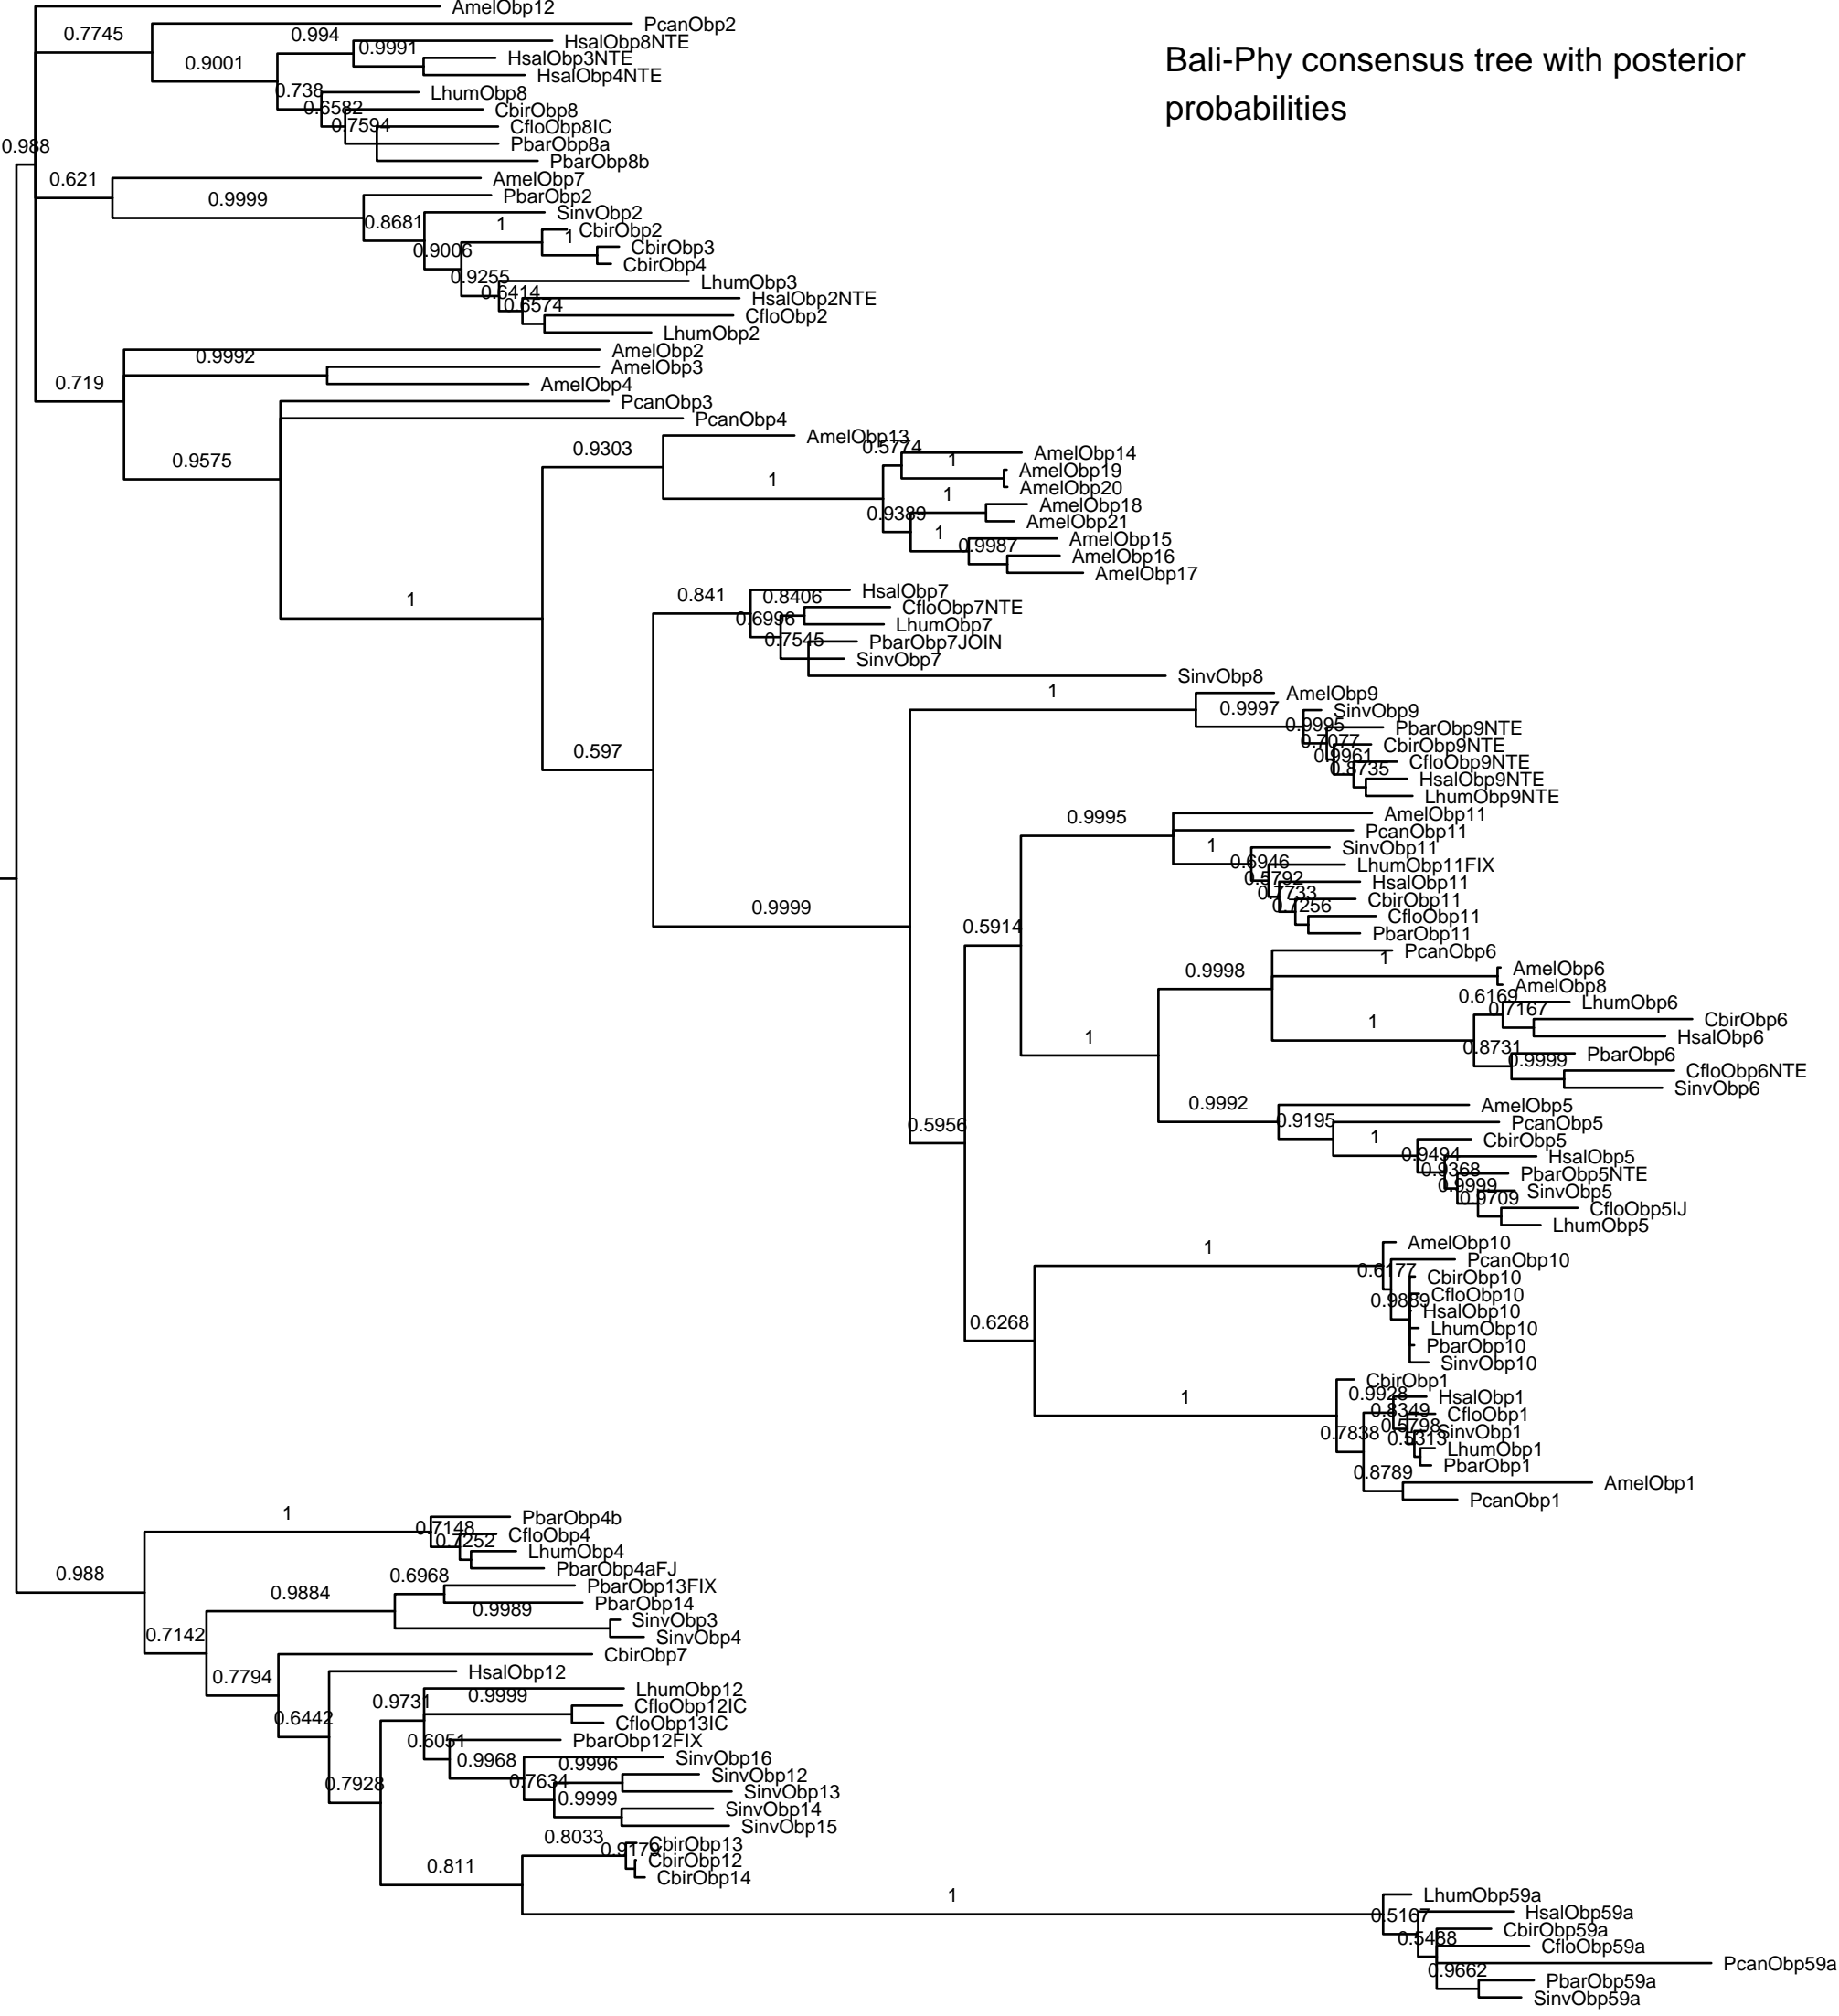

RAxML tree including signal peptides

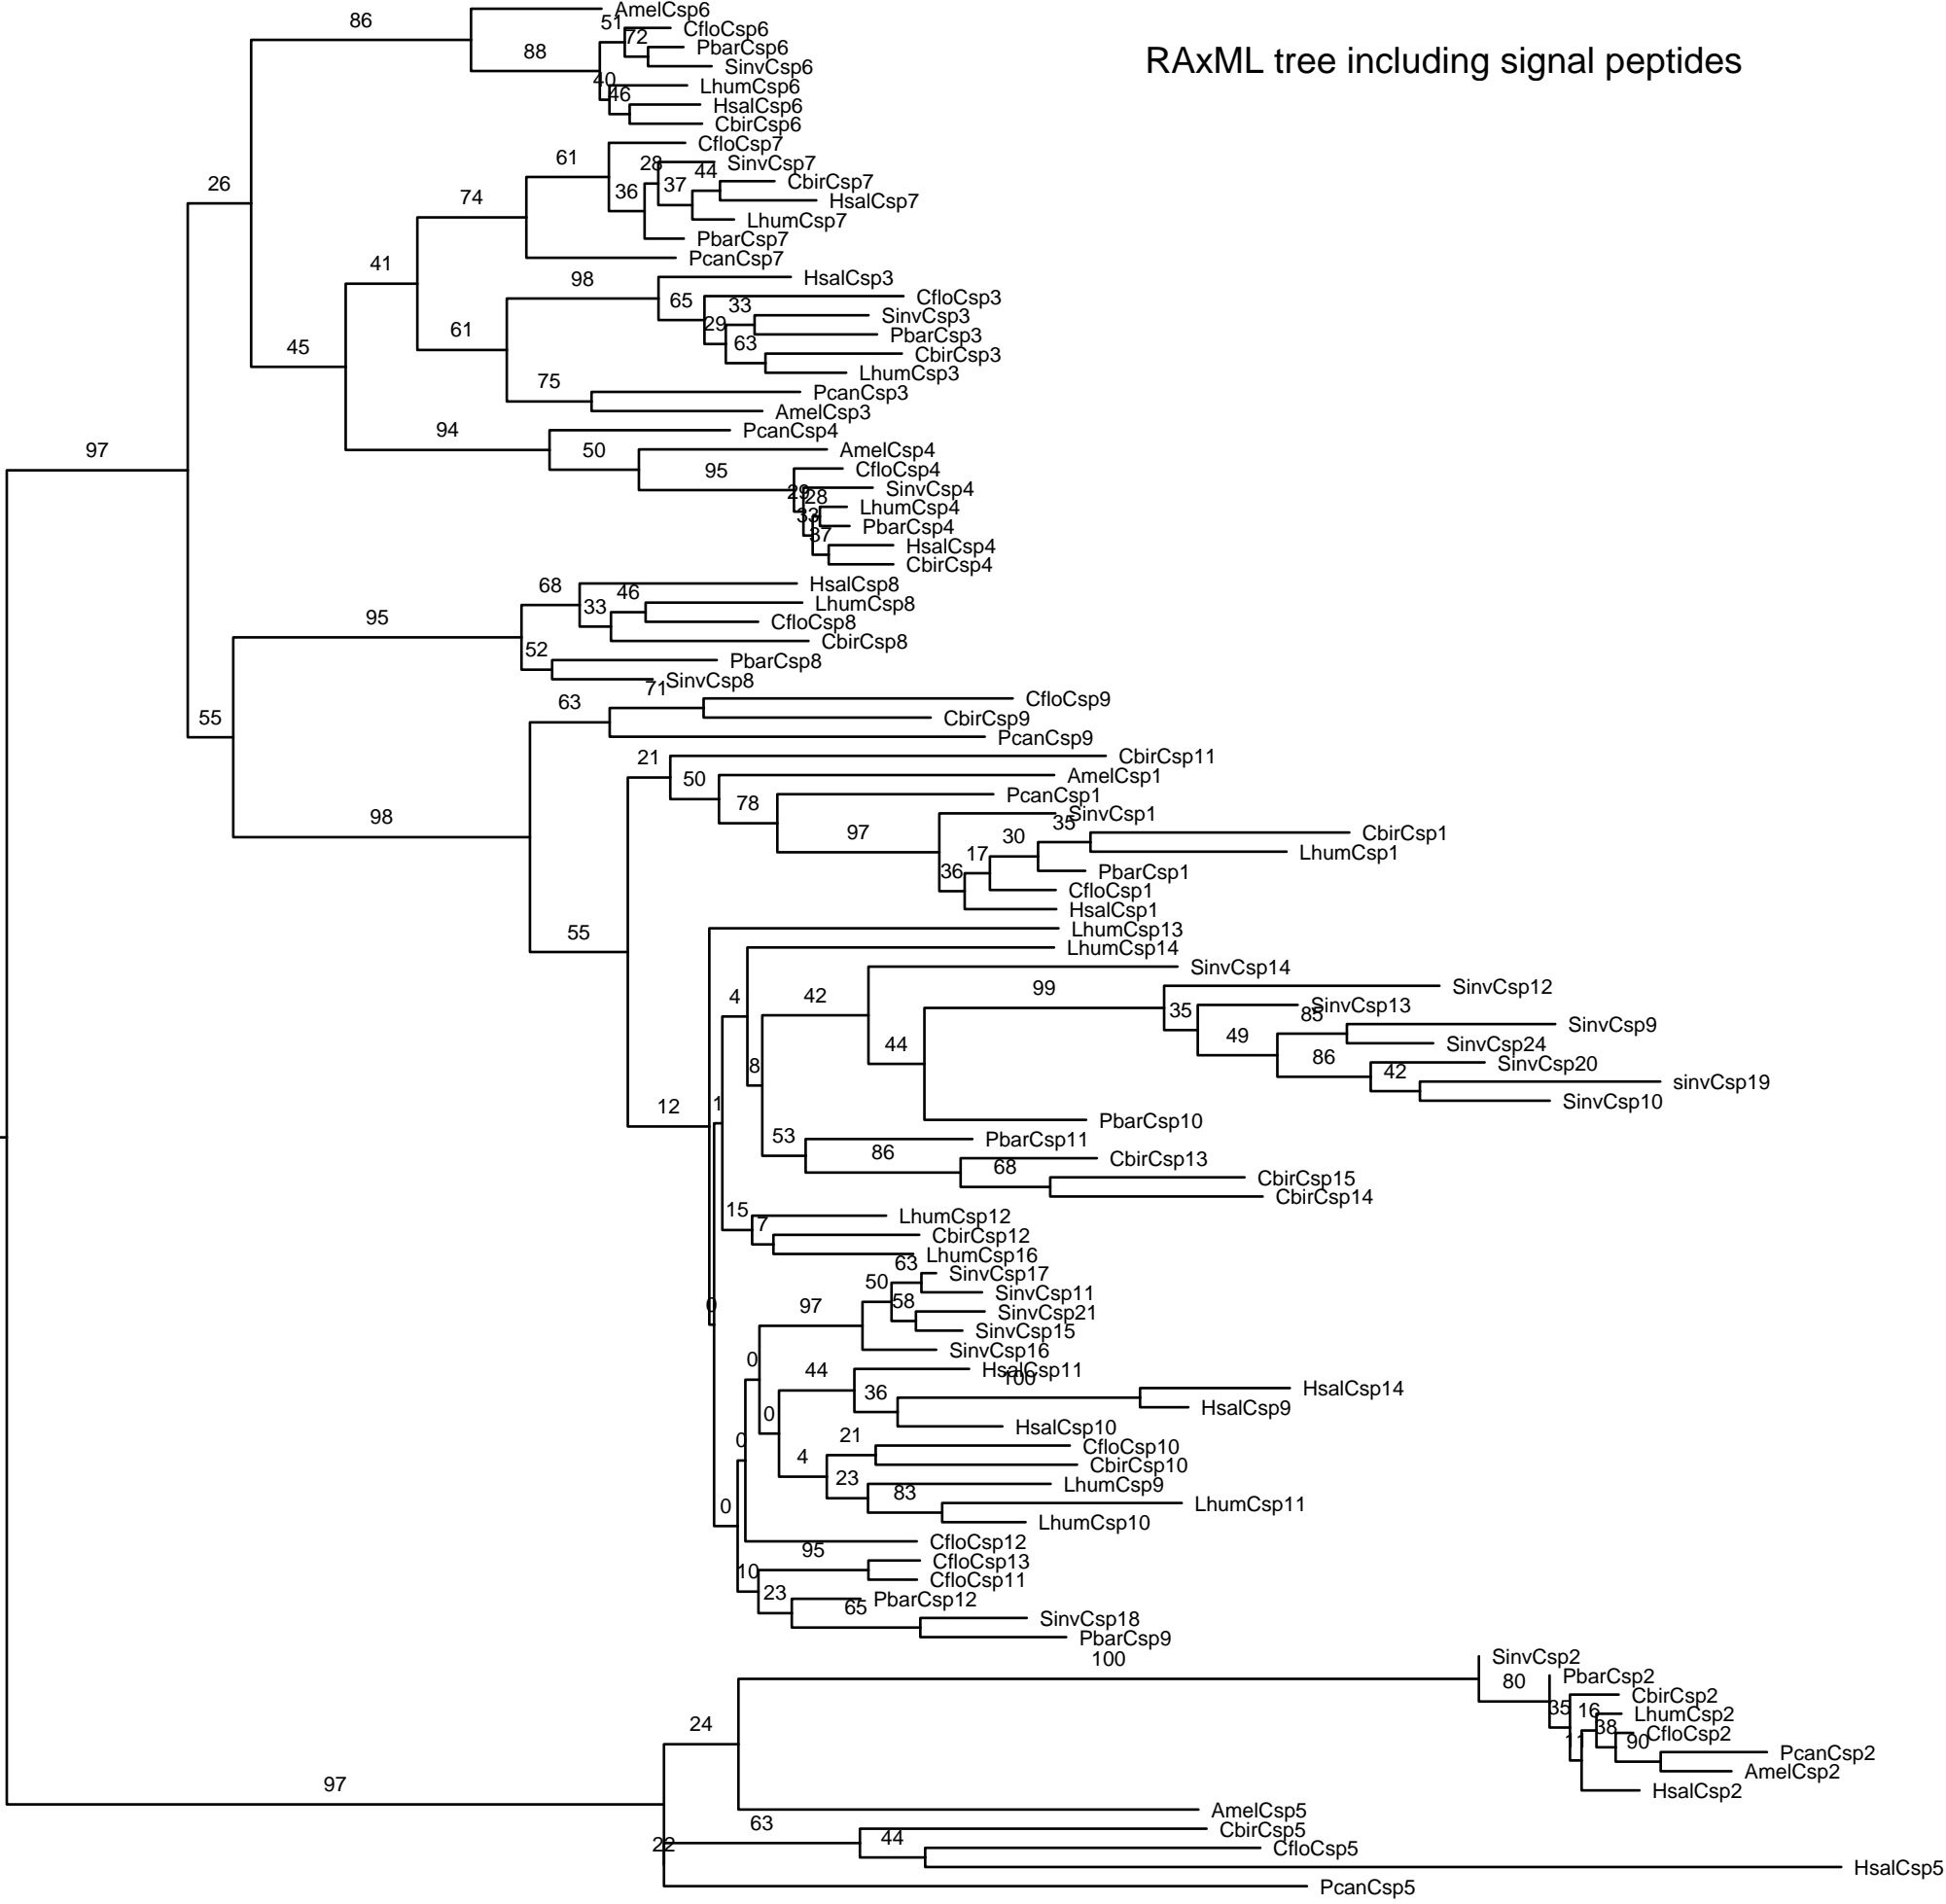

0.4

RAXML tree excluding signal peptides

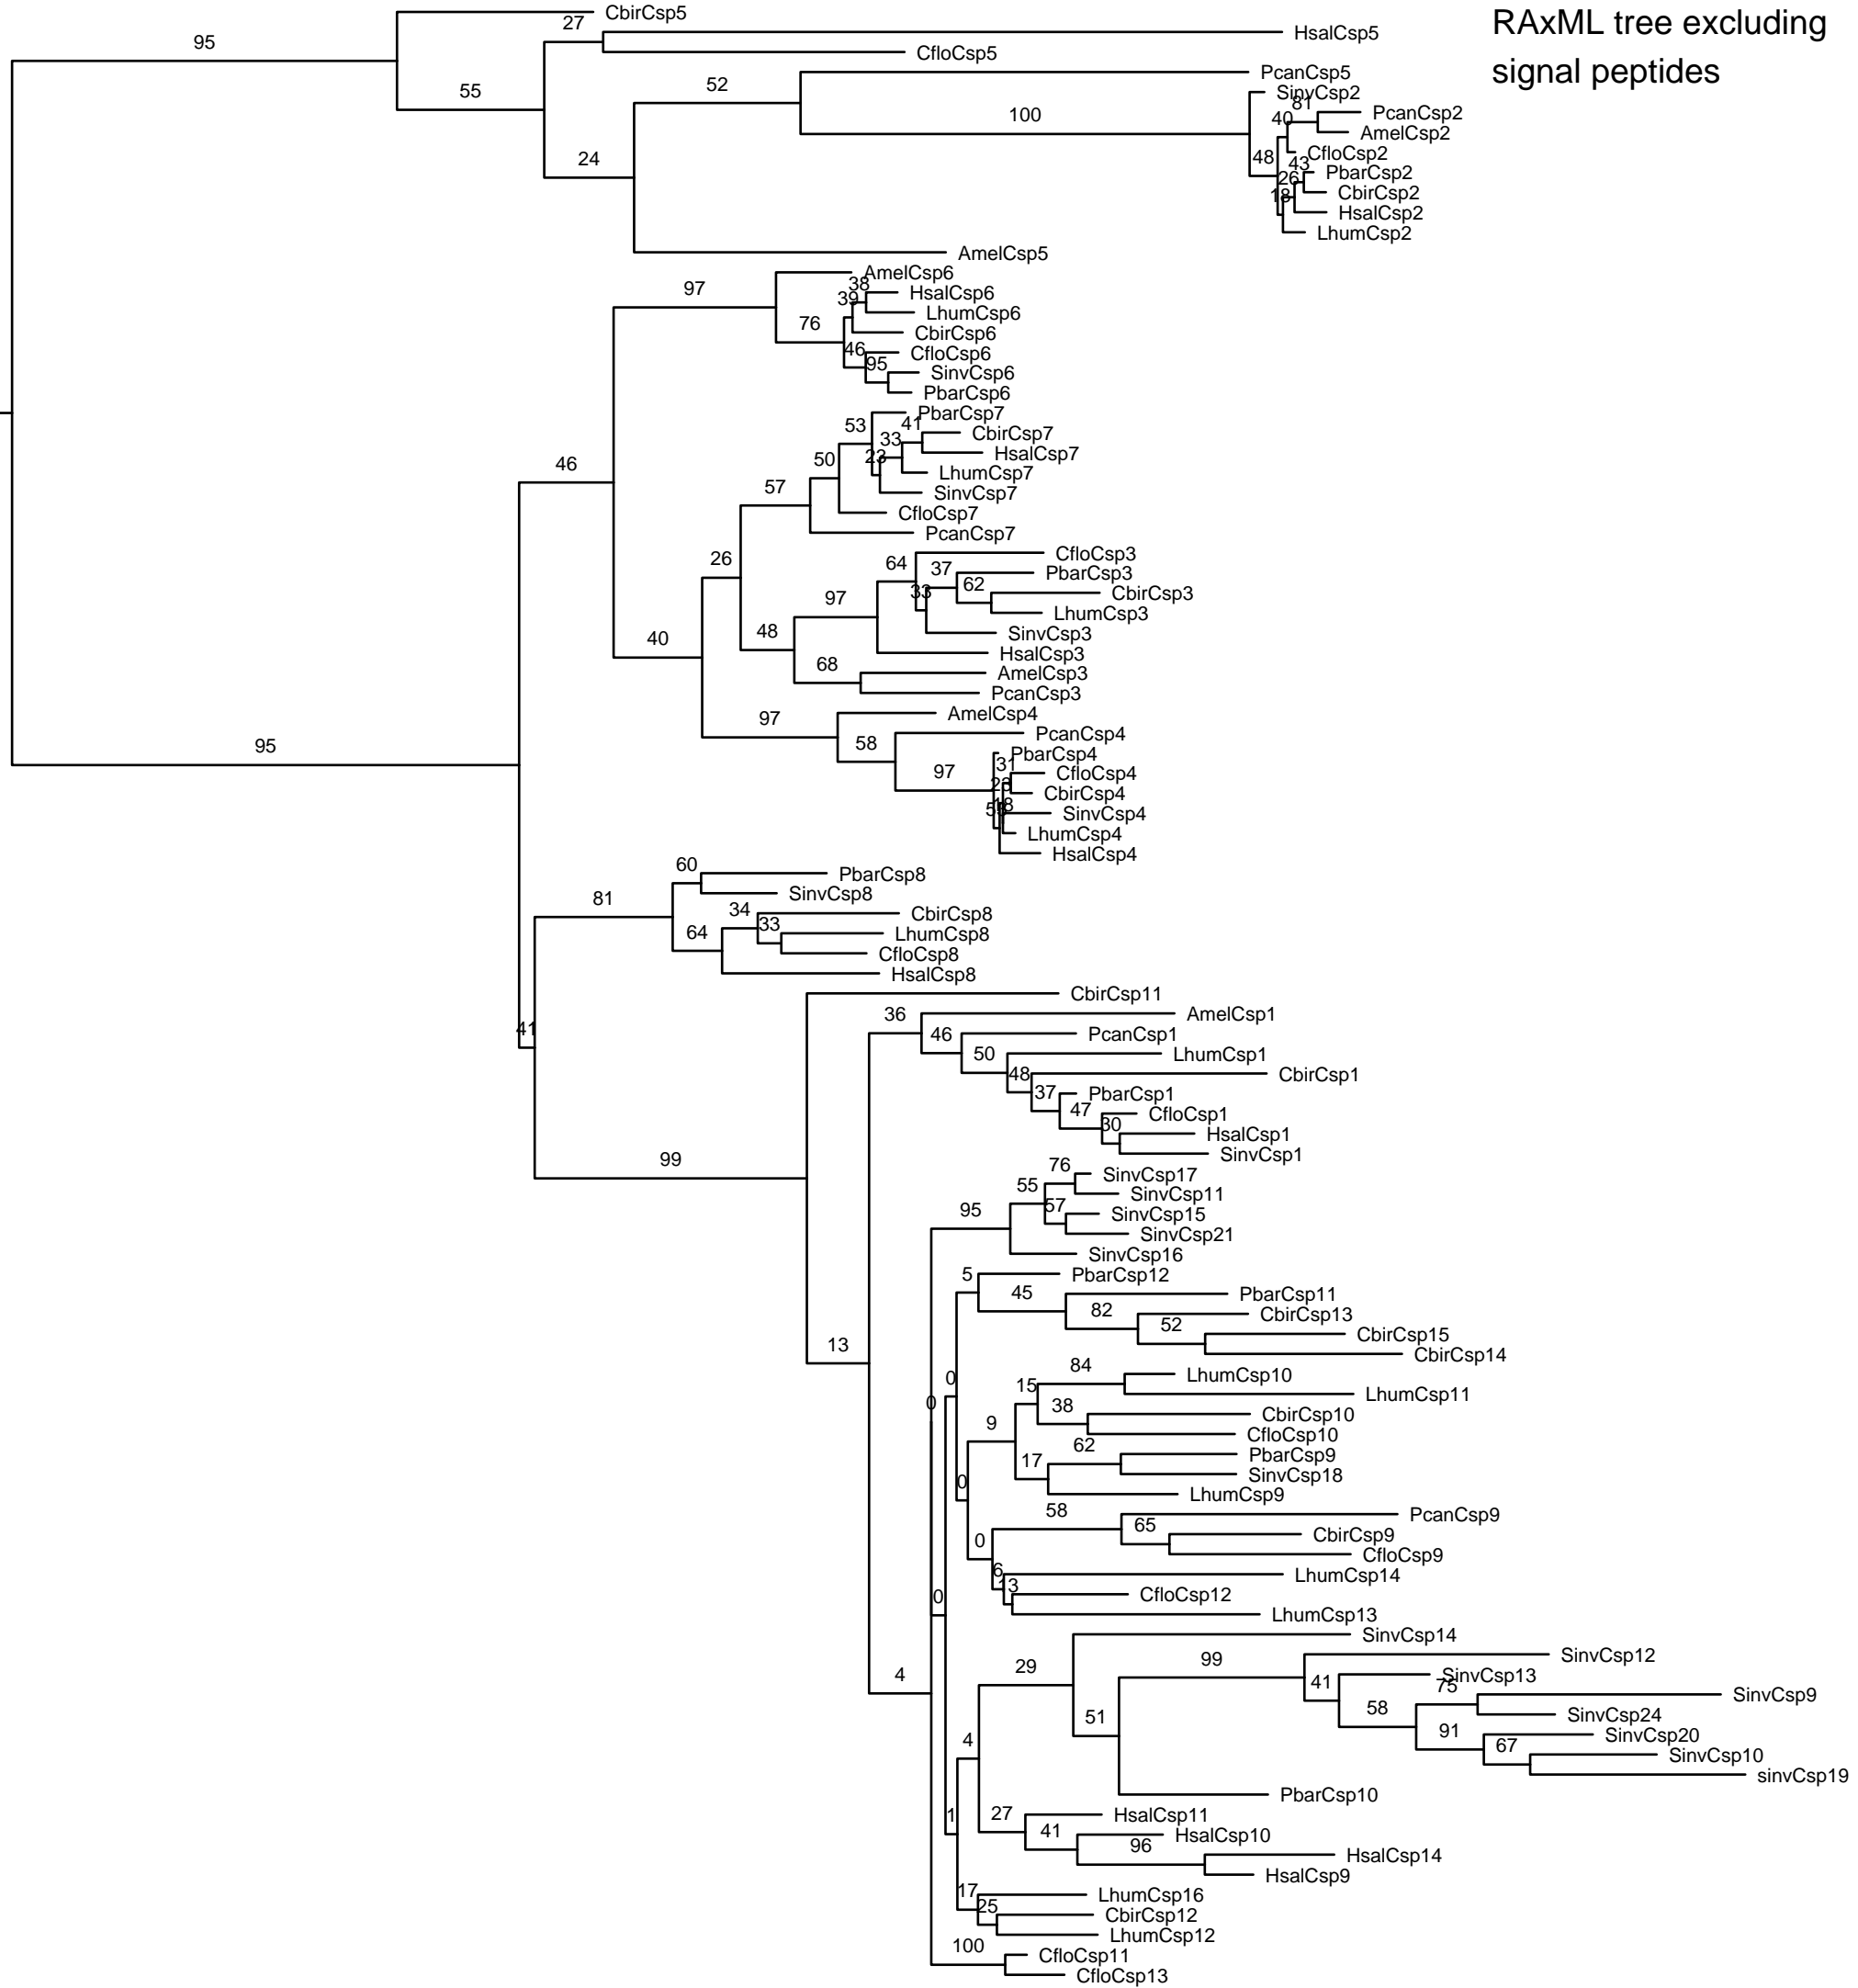

0.5

Bali-Phy consensus tree with posterior probabilities

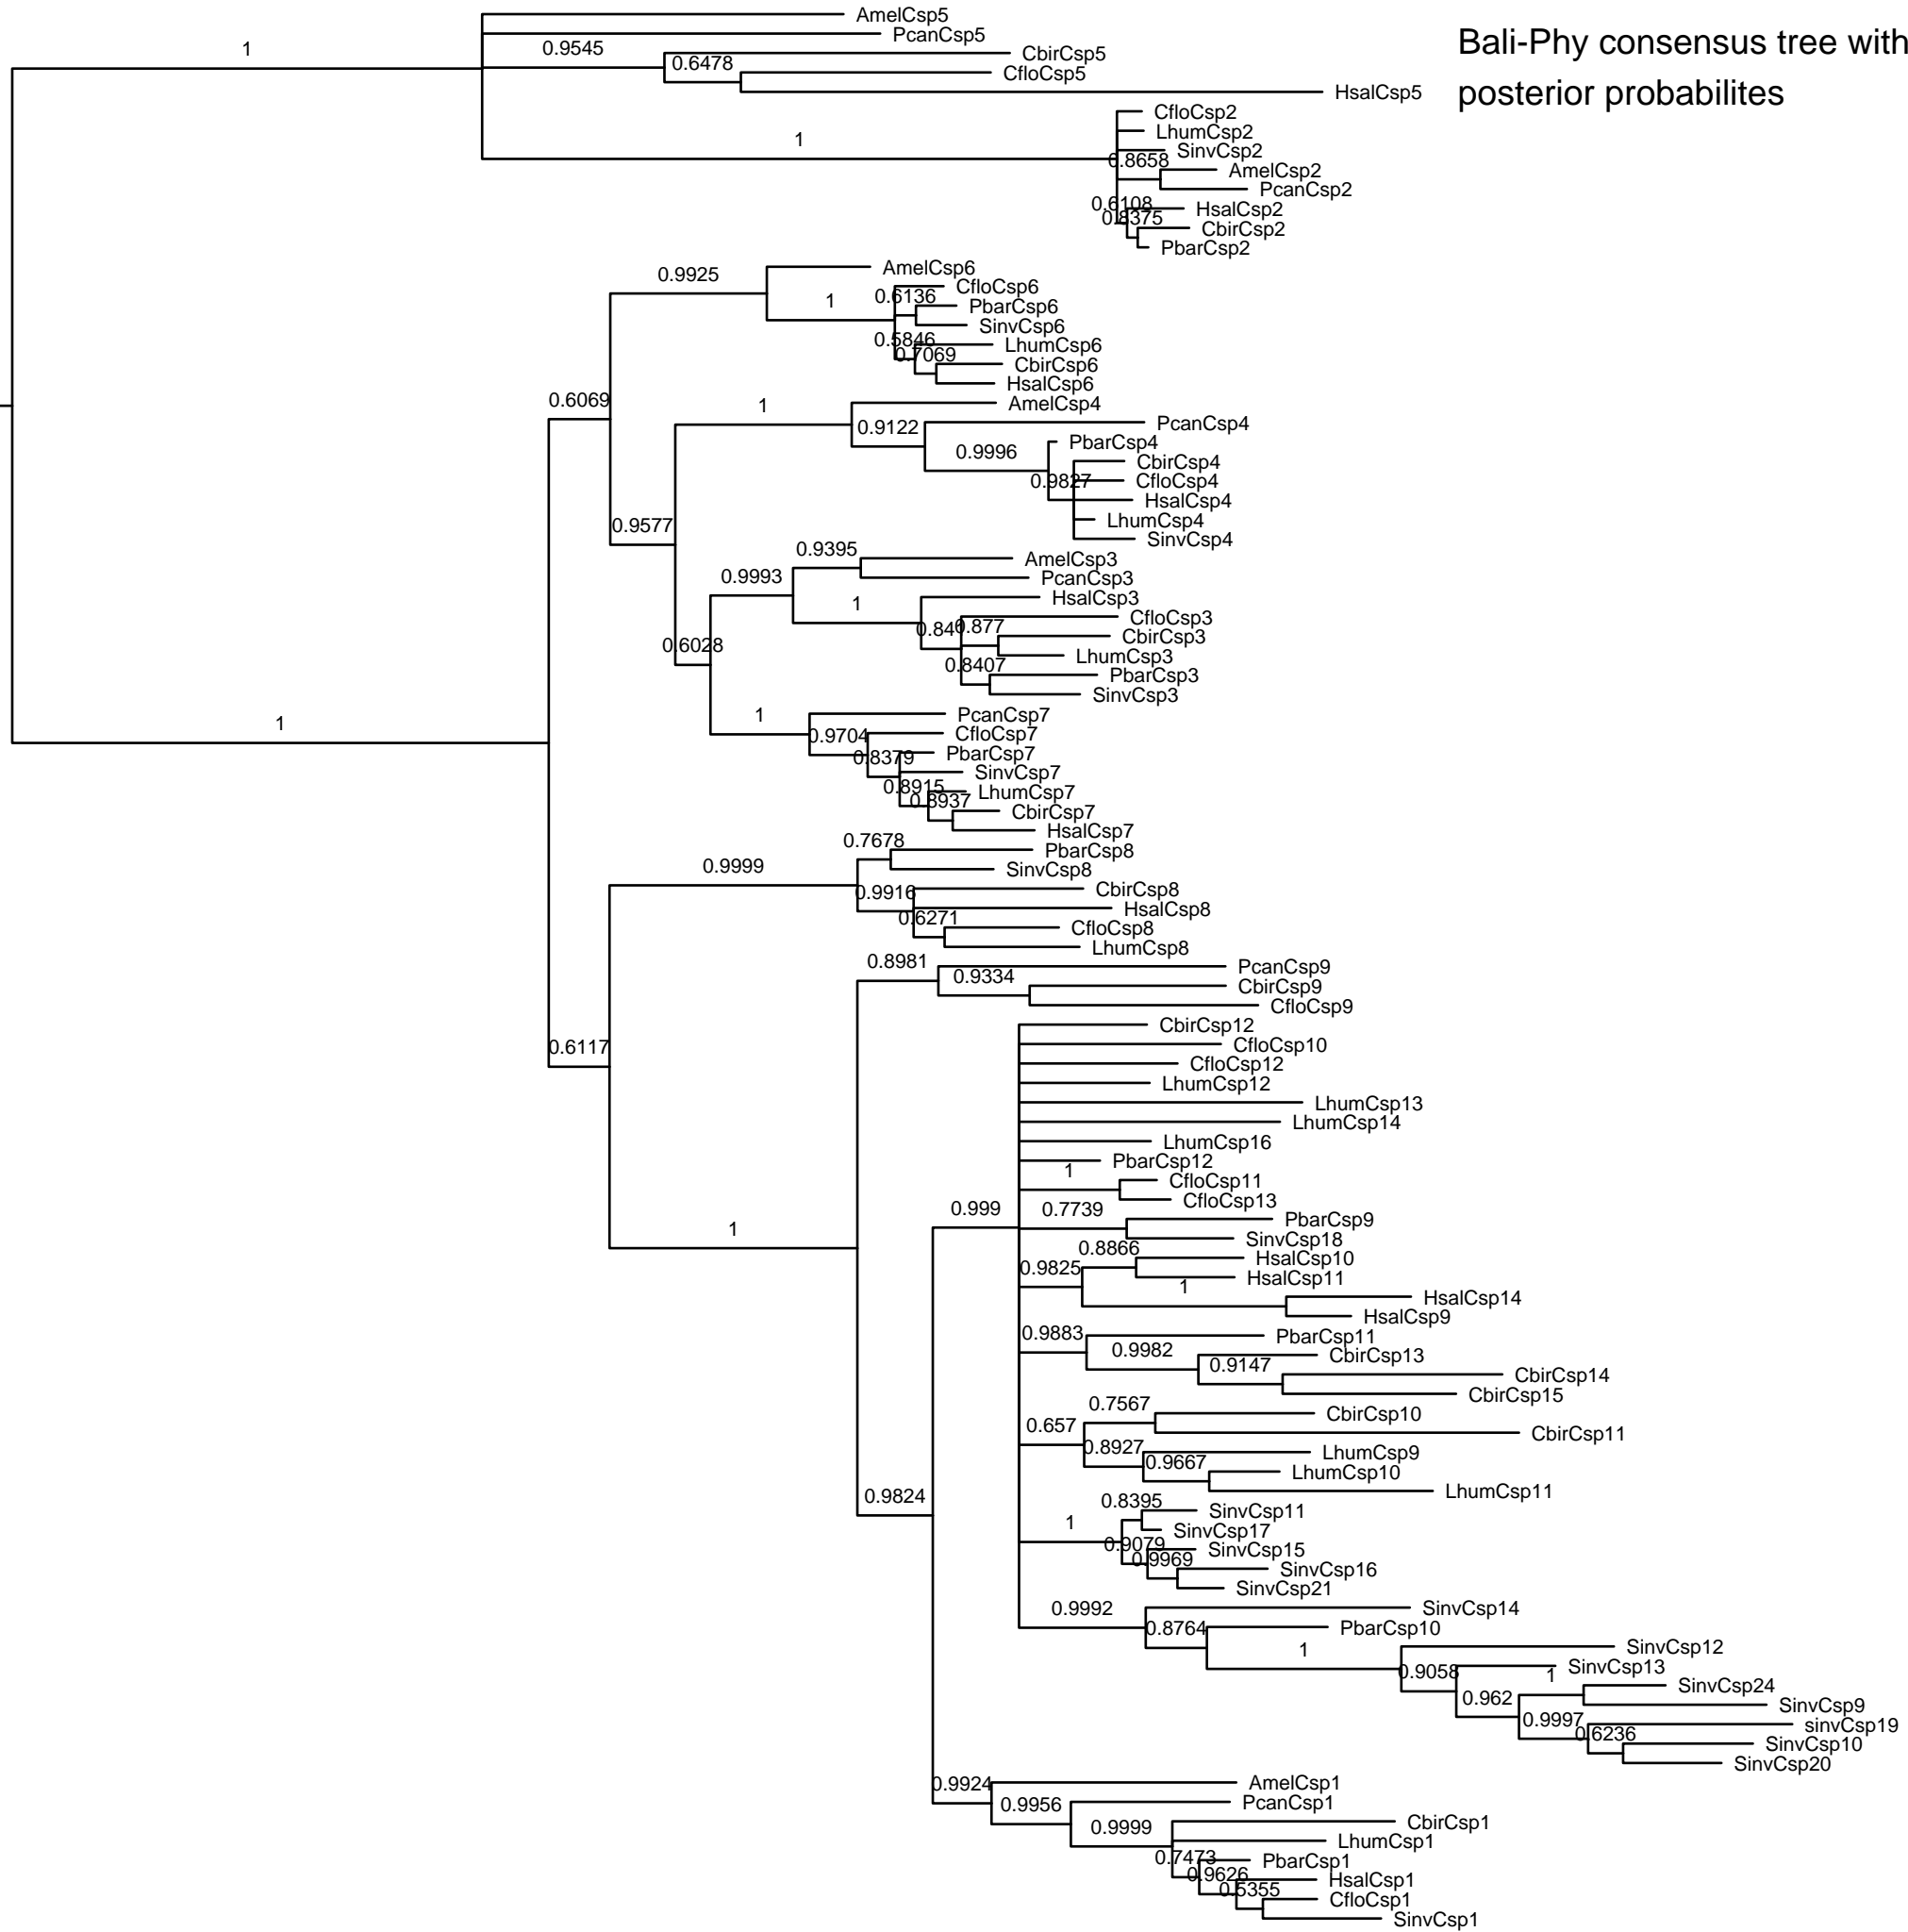

0.5
